# Supplementary material for: X-Linked Epilepsies: A Narrative Review
Source: MDPI journal article supplement (doi:10.3390/ijms25074110), 2024-04-08
Supplement: s1 [file s1]

**Supplementary Table S1**

| Gene                            | #patients                                                                                                           | Phenotype                                                                                                             |
|---------------------------------|---------------------------------------------------------------------------------------------------------------------|-----------------------------------------------------------------------------------------------------------------------|
| <b><i>PCDH19</i></b>            | 8 patients                                                                                                          | Typical <i>PCDH19</i> -DEE with clusters of FS, focal S, hypomotor and affective seizures                             |
| <b><i>CDKL5</i></b>             | 3 patients harboring <i>de novo</i> variants<br><br>1 patient with Xp22 deletion (13.804 Kb) including <i>CDKL5</i> | Tonic-spasms during sleep<br><br>Drug-resistant epileptic encephalopathy (prevalent tonic seizures)                   |
| <b><i>MECP2</i></b>             | 72 patients                                                                                                         | Both focal and generalized epilepsy (15/72 drug-resistant; about 21%)                                                 |
| <b><i>MECP2 duplication</i></b> | 2 males and 1 female                                                                                                | 2 (1F, 1M) Lennox Gastaut Syndrome<br><br>1 M with Lennox-like phenotype (late-onset drug-resistant epileptic spasms) |
| <b><i>FLNA</i></b>              | 2 patients                                                                                                          | Focal epilepsy, drug responsive                                                                                       |
| <b><i>IQSEC2</i></b>            | 1 patient                                                                                                           | Generalized epilepsy (tonic-clonic and atonic seizures)                                                               |
| <b><i>NEXMIF</i></b>            | 2 patients                                                                                                          | Epilepsy with eyelid myoclonia and Intellectual disability<br><br>Focal epilepsy with ID                              |

Legend: DEE: developmental and epileptic encephalopathy; F: female; FS: febrile seizures; ID: intellectual disability; M: male.
